# Supplementary material
Source: bioRxiv or medRxiv preprint supplement (https://medrxiv.org/highwire/filestream/93114/field_highwire_adjunct_files/7/2020.08.11.20172809-8.pdf)
Supplement: Supplementary file [file 2020.08.11.20172809-8.pdf]

Supplementary Table 5: Model Performance Metrics By Site.

|       |                      | Mount Sinai Brooklyn (MSB)    |                       |                       |                       |                       |                       |
|-------|----------------------|-------------------------------|-----------------------|-----------------------|-----------------------|-----------------------|-----------------------|
|       |                      | AUROC                         | AUPRC                 | ACC                   | SENS                  | SPEC                  | F1S                   |
| LASSO | Local                | 0.800 (0.742 - 0.857)         | 0.602 (0.489 - 0.715) | 0.782 (0.746 - 0.819) | 0.734 (0.621 - 0.847) | 0.797 (0.730 - 0.864) | 0.618 (0.565 - 0.671) |
|       | Pooled               | 0.816 (0.759 - 0.872)         | 0.599 (0.475 - 0.723) | 0.761 (0.690 - 0.832) | 0.865 (0.797 - 0.933) | 0.728 (0.620 - 0.836) | 0.650 (0.585 - 0.715) |
|       | Federated            | 0.802 (0.747 - 0.857)         | 0.568 (0.447 - 0.690) | 0.746 (0.687 - 0.805) | 0.872 (0.837 - 0.907) | 0.706 (0.623 - 0.790) | 0.633 (0.579 - 0.687) |
| MLP   | Local                | 0.833 (0.792 - 0.873)         | 0.596 (0.513 - 0.680) | 0.776 (0.733 - 0.818) | 0.879 (0.829 - 0.928) | 0.743 (0.677 - 0.808) | 0.660 (0.618 - 0.702) |
|       | Pooled               | 0.825 (0.774 - 0.876)         | 0.608 (0.491 - 0.725) | 0.787 (0.732 - 0.842) | 0.838 (0.774 - 0.903) | 0.771 (0.690 - 0.852) | 0.663 (0.612 - 0.714) |
|       | Federated No Noise   | 0.827 (0.771 - 0.883)         | 0.614 (0.509 - 0.719) | 0.776 (0.710 - 0.841) | 0.843 (0.780 - 0.907) | 0.754 (0.666 - 0.841) | 0.654 (0.584 - 0.725) |
|       | Federated With Noise | 0.812 (0.754 - 0.869)         | 0.601 (0.481 - 0.722) | 0.759 (0.705 - 0.814) | 0.836 (0.751 - 0.921) | 0.734 (0.652 - 0.817) | 0.635 (0.571 - 0.698) |
|       |                      | Mount Sinai Hospital (MSH)    |                       |                       |                       |                       |                       |
|       |                      | AUROC                         | AUPRC                 | ACC                   | SENS                  | SPEC                  | F1S                   |
| LASSO | Local                | 0.704 (0.643 - 0.764)         | 0.198 (0.142 - 0.254) | 0.734 (0.646 - 0.822) | 0.678 (0.556 - 0.800) | 0.739 (0.637 - 0.840) | 0.282 (0.240 - 0.323) |
|       | Pooled               | 0.797 (0.762 - 0.831)         | 0.284 (0.209 - 0.359) | 0.735 (0.686 - 0.784) | 0.823 (0.758 - 0.889) | 0.728 (0.674 - 0.782) | 0.316 (0.277 - 0.354) |
|       | Federated            | 0.773 (0.740 - 0.807)         | 0.246 (0.192 - 0.299) | 0.710 (0.649 - 0.771) | 0.799 (0.698 - 0.901) | 0.703 (0.631 - 0.775) | 0.293 (0.257 - 0.329) |
| MLP   | Local                | 0.762 (0.710 - 0.814)         | 0.243 (0.158 - 0.329) | 0.736 (0.677 - 0.796) | 0.754 (0.646 - 0.862) | 0.735 (0.665 - 0.806) | 0.298 (0.270 - 0.326) |
|       | Pooled               | 0.761 (0.687 - 0.835)         | 0.285 (0.207 - 0.363) | 0.758 (0.659 - 0.858) | 0.757 (0.648 - 0.866) | 0.759 (0.647 - 0.871) | 0.339 (0.275 - 0.402) |
|       | Federated No Noise   | 0.801 (0.743 - 0.858)         | 0.295 (0.213 - 0.376) | 0.833 (0.781 - 0.885) | 0.738 (0.646 - 0.831) | 0.840 (0.782 - 0.899) | 0.409 (0.328 - 0.489) |
|       | Federated With Noise | 0.767 (0.710 - 0.825)         | 0.261 (0.167 - 0.355) | 0.764 (0.677 - 0.851) | 0.772 (0.684 - 0.860) | 0.763 (0.666 - 0.861) | 0.354 (0.269 - 0.439) |
|       |                      | Mount Sinai Morningside (MSM) |                       |                       |                       |                       |                       |
|       |                      | AUROC                         | AUPRC                 | ACC                   | SENS                  | SPEC                  | F1S                   |
| LASSO | Local                | 0.676 (0.619 - 0.734)         | 0.243 (0.178 - 0.307) | 0.570 (0.496 - 0.645) | 0.859 (0.741 - 0.977) | 0.529 (0.432 - 0.626) | 0.334 (0.308 - 0.360) |
|       | Pooled               | 0.791 (0.746 - 0.835)         | 0.354 (0.292 - 0.415) | 0.734 (0.639 - 0.830) | 0.825 (0.723 - 0.926) | 0.721 (0.604 - 0.838) | 0.461 (0.382 - 0.541) |
|       | Federated            | 0.776 (0.725 - 0.828)         | 0.375 (0.288 - 0.462) | 0.718 (0.635 - 0.801) | 0.826 (0.732 - 0.919) | 0.703 (0.601 - 0.804) | 0.436 (0.375 - 0.498) |
| MLP   | Local                | 0.739 (0.679 - 0.799)         | 0.332 (0.274 - 0.389) | 0.774 (0.726 - 0.823) | 0.707 (0.616 - 0.798) | 0.783 (0.727 - 0.840) | 0.447 (0.376 - 0.519) |
|       | Pooled               | 0.726 (0.671 - 0.782)         | 0.301 (0.217 - 0.385) | 0.718 (0.644 - 0.793) | 0.740 (0.635 - 0.846) | 0.714 (0.622 - 0.806) | 0.406 (0.348 - 0.463) |
|       | Federated No Noise   | 0.796 (0.733 - 0.858)         | 0.409 (0.274 - 0.544) | 0.800 (0.746 - 0.853) | 0.760 (0.679 - 0.842) | 0.805 (0.739 - 0.871) | 0.503 (0.419 - 0.587) |
|       | Federated With Noise | 0.785 (0.724 - 0.846)         | 0.357 (0.282 - 0.432) | 0.725 (0.631 - 0.819) | 0.827 (0.722 - 0.932) | 0.711 (0.596 - 0.825) | 0.451 (0.377 - 0.525) |
|       |                      | Mount Sinai Queens (MSQ)      |                       |                       |                       |                       |                       |
|       |                      | AUROC                         | AUPRC                 | ACC                   | SENS                  | SPEC                  | F1S                   |
| LASSO | Local                | 0.733 (0.680 - 0.786)         | 0.46 (0.361 - 0.559)  | 0.676 (0.587 - 0.765) | 0.845 (0.731 - 0.959) | 0.624 (0.483 - 0.765) | 0.557 (0.509 - 0.605) |
|       | Pooled               | 0.736 (0.693 - 0.779)         | 0.479 (0.391 - 0.568) | 0.689 (0.614 - 0.764) | 0.804 (0.730 - 0.878) | 0.653 (0.538 - 0.768) | 0.553 (0.509 - 0.597) |
|       | Federated            | 0.693 (0.643 - 0.744)         | 0.428 (0.348 - 0.507) | 0.678 (0.595 - 0.760) | 0.778 (0.662 - 0.895) | 0.645 (0.510 - 0.780) | 0.533 (0.482 - 0.585) |
| MLP   | Local                | 0.795 (0.756 - 0.834)         | 0.536 (0.473 - 0.600) | 0.743 (0.683 - 0.802) | 0.840 (0.730 - 0.950) | 0.714 (0.61 - 0.817)  | 0.606 (0.564 - 0.648) |
|       | Pooled               | 0.754 (0.721 - 0.788)         | 0.491 (0.428 - 0.553) | 0.715 (0.651 - 0.779) | 0.805 (0.713 - 0.897) | 0.687 (0.582 - 0.792) | 0.571 (0.537 - 0.606) |
|       | Federated No Noise   | 0.822 (0.786 - 0.858)         | 0.558 (0.488 - 0.628) | 0.772 (0.715 - 0.829) | 0.813 (0.728 - 0.898) | 0.760 (0.671 - 0.848) | 0.628 (0.580 - 0.676) |
|       | Federated With Noise | 0.822 (0.789 - 0.855)         | 0.553 (0.471 - 0.635) | 0.796 (0.753 - 0.840) | 0.821 (0.740 - 0.903) | 0.788 (0.716 - 0.860) | 0.656 (0.606 - 0.705) |
|       |                      | Mount Sinai West (MSW)        |                       |                       |                       |                       |                       |
|       |                      | AUROC                         | AUPRC                 | ACC                   | SENS                  | SPEC                  | F1S                   |
| LASSO | Local                | 0.454 (0.281 - 0.626)         | 0.070 (0.028 - 0.111) | 0.483 (0.259 - 0.707) | 0.800 (0.570 - 1.030) | 0.468 (0.223 - 0.712) | 0.173 (0.070 - 0.277) |
|       | Pooled               | 0.822 (0.735 - 0.909)         | 0.304 (0.103 - 0.504) | 0.760 (0.648 - 0.873) | 0.967 (0.891 - 1.042) | 0.748 (0.629 - 0.868) | 0.379 (0.240 - 0.518) |
|       | Federated            | 0.805 (0.726 - 0.885)         | 0.316 (0.139 - 0.494) | 0.792 (0.668 - 0.915) | 0.883 (0.745 - 1.022) | 0.785 (0.649 - 0.921) | 0.409 (0.269 - 0.550) |
| MLP   | Local                | 0.739 (0.613 - 0.864)         | 0.259 (0.071 - 0.447) | 0.775 (0.630 - 0.919) | 0.834 (0.708 - 0.959) | 0.773 (0.619 - 0.926) | 0.418 (0.227 - 0.608) |
|       | Pooled               | 0.829 (0.742 - 0.916)         | 0.268 (0.125 - 0.411) | 0.808 (0.704 - 0.911) | 0.933 (0.833 - 1.034) | 0.801 (0.689 - 0.913) | 0.412 (0.306 - 0.519) |
|       | Federated No Noise   | 0.834 (0.742 - 0.925)         | 0.398 (0.182 - 0.613) | 0.789 (0.666 - 0.913) | 0.967 (0.891 - 1.042) | 0.779 (0.646 - 0.912) | 0.462 (0.266 - 0.657) |
|       | Federated With Noise | 0.830 (0.743 - 0.917)         | 0.333 (0.097 - 0.569) | 0.771 (0.629 - 0.912) | 0.967 (0.891 - 1.042) | 0.759 (0.607 - 0.911) | 0.453 (0.245 - 0.661) |
